# Supplementary material
Source: PubMed Central journal article supplement (PMC4221367)
Supplement: supp_the2014-0159_Hamamoto_Yamada-14-159.pdf [file supp_the2014-0159_Hamamoto_Yamada-14-159.pdf]

## Overview

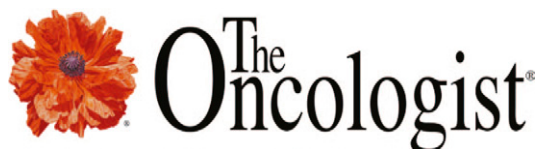

The official journal of the Society for Translational Oncology

**First Published Online October 3, 2014**

**DOI:** 10.1634/theoncologist.2014-0159

**Title:** A Phase I/II Study of XELIRI Plus Bevacizumab as Second-Line Chemotherapy for Japanese Patients With Metastatic Colorectal Cancer (BIX Study)

**Authors:** Yasuo Hamamoto,<sup>a</sup> Tatsuro Yamaguchi,<sup>b</sup> Tomohiro Nishina,<sup>c</sup> Kentaro Yamazaki,<sup>d</sup> Takashi Ura,<sup>e</sup> Takako Nakajima,<sup>f</sup> Ayumu Goto,<sup>g</sup> Ken Shimada,<sup>h</sup> Norisuke Nakayama,<sup>i</sup> Junichi Sakamoto,<sup>j</sup> Satoshi Morita,<sup>k</sup> Yasuhide Yamada<sup>l</sup>

<sup>a</sup>Keio Cancer Center, School of Medicine, Keio University, Tokyo, Japan; <sup>b</sup>Department of Surgery, Tokyo Metropolitan Cancer and Infectious Disease Center, Komagome Hospital, Tokyo, Japan; <sup>c</sup>Department of Gastrointestinal Medical Oncology, National Hospital Organization Shikoku Cancer Center, Ehime, Japan; <sup>d</sup>Division of Gastrointestinal Oncology, Shizuoka Cancer Center, Shizuoka, Japan; <sup>e</sup>Department of Clinical Oncology, Aichi Cancer Center Central Hospital, Nagoya, Japan; <sup>f</sup>Department of Medical Oncology, St. Marianna University School of Medicine, Kanagawa, Japan; <sup>g</sup>Department of Clinical Oncology, Yokohama City University Hospital, Kanagawa, Japan; <sup>h</sup>Department of Medical Oncology, Showa University Northern Yokohama Hospital, Kanagawa, Japan; <sup>i</sup>Department of Gastroenterology, Kanagawa Cancer Center Hospital, Kanagawa, Japan; <sup>j</sup>Director, Tokai Central Hospital, Gifu, Japan; <sup>k</sup>Department of Biostatistics and Epidemiology, Graduate School of Medicine, Kyoto University, Kyoto, Japan; <sup>l</sup>Gastrointestinal Oncology Division, National Cancer Center Hospital, Tokyo, Japan

**ClinicalTrials.gov Identifier:** UMIN000003482

**Sponsor(s):** Epidemiological and Clinical Research Information Network: ECRIN (Kyoto, Japan)

**Principal Investigator:** Yasuhide Yamada

**IRB Approved:** Yes

### Disclosures

**Tatsuro Yamaguchi:** Taiho Pharmaceutical Co., Ltd., Chugai Pharmaceutical Co., Ltd. (H); **Tomohiro Nishina:** Chugai Pharmaceutical Co., Ltd., Yakult Honsha Co., Ltd. (H); **Kentaro Yamazaki:** Chugai Pharmaceutical Co., Ltd., Yakult Honsha Co., Ltd. (H); **Takako Nakajima:** Chugai Pharmaceutical Co., Ltd. (RF, H); **Ayumu Goto:** Chugai Pharmaceutical Co., Ltd. (H); **Yasuhide Yamada:** Chugai Pharmaceutical Co., Ltd., Yakult Honsha Co., Ltd. (H); Chugai Pharmaceutical Co., Ltd. (RF); **Satoshi Morita:** Chugai Pharmaceutical Co., Ltd. (H). The other authors indicated no financial relationships.

(C/A) Consulting/advisory relationship; (RF) Research funding; (E) Employment; (ET) Expert testimony; (H) Honoraria received; (OI) Ownership interests; (IP) Intellectual property rights/inventor/patent holder; (SAB) Scientific advisory board

## Author Summary: Abstract and Brief Discussion

### Background

Capecitabine is used mainly with oxaliplatin to treat metastatic colorectal cancer (mCRC) [1, 2]. Results from capecitabine plus irinotecan (XELIRI) with or without bevacizumab (BV) have been reported in Europe but not in Japan [3–10]. Consequently, the safety and efficacy of XELIRI plus BV in Japanese patients with mCRC were assessed in a single-arm phase II study.

### Methods

Eligible patients had had prior chemotherapy containing BV for mCRC and wild-type or heterozygous UGT1A1. Therapy in each 21-day treatment cycle consisted of capecitabine (800 mg/m<sup>2</sup> twice daily on days 1–15), irinotecan (200 mg/m<sup>2</sup> on day 1), and BV (7.5 mg/kg on day 1). The primary endpoint was dose-limiting toxicity in phase I and progression-free survival (PFS) in phase II.

## Results

A total of 34 patients (6 in phase I, 28 in phase II) were enrolled from May 2010 to June 2011. Baseline characteristics included a median age of 60 years (range: 22–74 years) for 24 men and 10 women (Table 2). No dose-limiting toxicities appeared in phase I. Median PFS was 240 days (95% confidence interval: 179–311 days). Overall response rate was 18.1%, and the disease-control rate was 90.9%. The incidence of adverse events frequently associated with irinotecan and capecitabine were neutropenia (any grade, 55.9%; grade 3 or 4, 11.8%), diarrhea (any grade, 50%; grade 3 or 4, 5.9%), and hand-foot syndrome (any grade, 61.8%; grade 3 or 4, 5.9%) (Table 4).

## Conclusion

Our results suggest that XELIRI plus BV is well tolerated and effective as a second-line treatment for mCRC in Japanese patients. This regimen could be especially appropriate for patients resistant to oxaliplatin-based regimens.

## Discussion

In this prospective trial for Japanese patients with metastatic colorectal cancer, capecitabine plus irinotecan (XELIRI) plus bevacizumab as a second-line regimen achieved longer progression-free survival (240 days) and a higher overall response rate (18.1%) than other reported regimens, with an acceptable tolerability profile (Table 3). Unlike FOLFIRI, XELIRI doses do not require a long infusion process or an infuser pump, providing a great advantage to patients. The key finding in this study was that XELIRI plus bevacizumab demonstrated promising results beyond progression in Japanese patients.

## Trial Information

|                                                        |                                                                                                                                            |
|--------------------------------------------------------|--------------------------------------------------------------------------------------------------------------------------------------------|
| <b>Disease</b>                                         | Colorectal cancer                                                                                                                          |
| <b>Stage of disease / treatment</b>                    | Metastatic / Advanced                                                                                                                      |
| <b>Prior Therapy</b>                                   | 1 prior regimen                                                                                                                            |
| <b>Type of study - 1</b>                               | Phase II                                                                                                                                   |
| <b>Type of study - 2</b>                               | Single arm                                                                                                                                 |
| <b>Primary Endpoint</b>                                | Progression-free survival                                                                                                                  |
| <b>Secondary Endpoint</b>                              | Overall response rate                                                                                                                      |
| <b>Secondary Endpoint</b>                              | Overall survival                                                                                                                           |
| <b>Additional Details of Endpoints or Study Design</b> | Phase I part: the primary endpoint was estimated dose-limiting toxicity in the first cycle. Another secondary endpoint was adverse events. |
| <b>Investigator's Analysis</b>                         | Active and should be pursued further                                                                                                       |

## Drug Information

|                                   |                                                                   |
|-----------------------------------|-------------------------------------------------------------------|
| <b>Drug 1</b>                     |                                                                   |
| <b>Generic/Working name</b>       | Capecitabine                                                      |
| <b>Trade name</b>                 | XELODA                                                            |
| <b>Company name</b>               | Chugai Pharmaceutical Co., Ltd. (Tokyo, Japan).                   |
| <b>Drug type</b>                  | Other                                                             |
| <b>Drug class</b>                 | Antimetabolite                                                    |
| <b>Dose</b>                       | 1,600 mg/m <sup>2</sup>                                           |
| <b>Route</b>                      | Oral (p.o.)                                                       |
| <b>Schedule of Administration</b> | 2 divided administrations daily on days 1–14 of each 21-day cycle |
| <b>Drug 2</b>                     |                                                                   |
| <b>Generic/Working name</b>       | Irinotecan                                                        |
| <b>Trade name</b>                 | Campto/Topotecin                                                  |
| <b>Company name</b>               | Yakult Honsha/Daiichi Sankyo Company                              |
| <b>Drug type</b>                  | Other                                                             |
| <b>Drug class</b>                 | Topoisomerase I                                                   |
| <b>Dose</b>                       | 200 mg/m <sup>2</sup>                                             |

|                            |                                                 |
|----------------------------|-------------------------------------------------|
| Route                      | IV                                              |
| Schedule of Administration | On day 1 in each 21-day cycle                   |
| <b>Drug 3</b>              |                                                 |
| Generic/Working name       | Bevacizumab                                     |
| Trade name                 | Avastin                                         |
| Company name               | Chugai Pharmaceutical Co., Ltd. (Tokyo, Japan). |
| Drug type                  | Antibody                                        |
| Drug class                 | Angiogenesis - VEGF                             |
| Dose                       | 7.5 mg/kg                                       |
| Route                      | IV                                              |
| Schedule of Administration | On day 1 in each 21-day cycle                   |

## Patient Characteristics

|                                     |                                                           |
|-------------------------------------|-----------------------------------------------------------|
| Number of patients, male            | 24                                                        |
| Number of patients, female          | 10                                                        |
| Stage                               | Stage IV/Recurrent                                        |
| Age                                 | Median (range): 60 (22–74)                                |
| Number of prior systemic therapies  | Median (range): 1                                         |
| Performance Status:                 | ECOG<br>0 — 22<br>1 — 12<br>2 — 0<br>3 — 0<br>unknown — 0 |
| Other                               | Not Collected                                             |
| Cancer Types or Histologic Subtypes | Colorectal cancer, adenocarcinoma 34                      |

## Primary Assessment Method

### Experimental Arm: Colorectal Cancer, Adenocarcinoma

|                                           |                       |
|-------------------------------------------|-----------------------|
| Number of patients screened               | 34                    |
| Number of patients enrolled               | 34                    |
| Number of patients evaluable for toxicity | 34                    |
| Number of patients evaluated for efficacy | 34                    |
| Evaluation method                         | Other                 |
| Response assessment CR                    | 0%                    |
| Response assessment PR                    | 18.1%                 |
| Response assessment SD                    | 72.7%                 |
| Response assessment PD                    | 9%                    |
| Response assessment other                 | 0%                    |
| (Median) duration assessments PFS         | 240 days, CI: 179-311 |
| (Median) duration assessments OS          | 665 days, CI: 487-NA  |

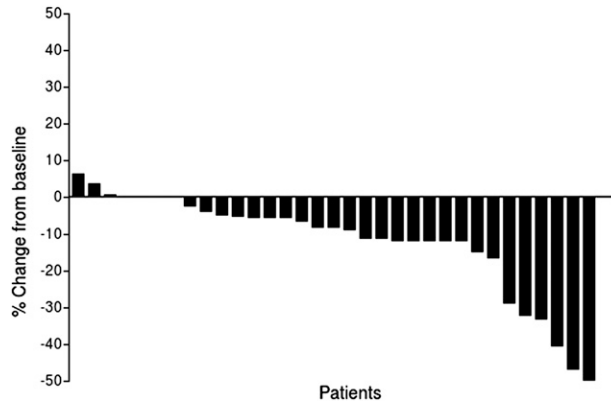

**Waterfall plot.** Waterfall plot of best response.

|                             |                                   |
|-----------------------------|-----------------------------------|
| Experimental Arm:           | Total Patient Population          |
| Evaluation method:          | Other                             |
| Secondary Assessment Method |                                   |
| Experimental Arm:           | Colorectal Cancer, Adenocarcinoma |

## Adverse events

| Name                                  | *NC/NA | 1   | 2   | 3   | 4  | 5  | All grades |
|---------------------------------------|--------|-----|-----|-----|----|----|------------|
| Leukocytes (total WBC)                | 41%    | 23% | 35% | 0%  | 0% | 0% | 58%        |
| Neutrophils/granulocytes (ANC/AGC)    | 44%    | 8%  | 35% | 11% | 0% | 0% | 55%        |
| Hemoglobin                            | 29%    | 50% | 17% | 2%  | 0% | 0% | 70%        |
| Platelets                             | 52%    | 41% | 5%  | 0%  | 0% | 0% | 47%        |
| Diarrhea                              | 50%    | 14% | 29% | 5%  | 0% | 0% | 50%        |
| Anorexia                              | 47%    | 32% | 14% | 5%  | 0% | 0% | 52%        |
| Nausea                                | 47%    | 32% | 11% | 8%  | 0% | 0% | 52%        |
| Vomiting                              | 70%    | 20% | 5%  | 2%  | 0% | 0% | 29%        |
| Fatigue (asthenia, lethargy, malaise) | 61%    | 11% | 23% | 2%  | 0% | 0% | 38%        |
| Mucositis/stomatitis (clinical exam)  | 82%    | 11% | 5%  | 0%  | 0% | 0% | 17%        |
| Dizziness                             | 94%    | 0%  | 0%  | 5%  | 0% | 0% | 5%         |
| Neuropathy: sensory                   | 70%    | 17% | 8%  | 2%  | 0% | 0% | 29%        |
| Hair loss/alopecia (scalp or body)    | 67%    | 17% | 14% | 0%  | 0% | 0% | 32%        |
| Rash: hand-foot skin reaction         | 38%    | 44% | 11% | 5%  | 0% | 0% | 61%        |
| Renal/genitourinary, other            | 52%    | 20% | 23% | 2%  | 0% | 0% | 47%        |
| Hypertension                          | 67%    | 5%  | 17% | 8%  | 0% | 0% | 32%        |

\*No Change From Baseline/No Adverse Event

Adverse events during phase I/II treatment; no serious adverse events were reported.

Abbreviations: AGC, absolute granulocyte count; ANC, absolute neutrophil count; WBC, white blood cells.

## Assessment, Analysis, and Discussion

|                                            |                                      |
|--------------------------------------------|--------------------------------------|
| <b>Completion</b>                          | Study completed                      |
| <b>Pharmacokinetics / Pharmacodynamics</b> | Not collected                        |
| <b>Investigator's Assessment</b>           | Active and should be pursued further |

## Discussion

This study was conducted as a second-line treatment with bevacizumab beyond progression. Key eligibility comprised disease progression during or after first-line chemotherapy, including oxaliplatin-based regimens with bevacizumab, and a wild type or \*6 or \*28 heterozygous genotype for UGT1A1.

Although grade 3 diarrhea was observed in only 5% of patients in our study (Table 1), it was noted that the response rate (18.1%) and progression-free survival (PFS; 8 months) were better than historical second-line data (Figs. 1, 2, 3) [11–13]. In oxaliplatin-refractory second-line treatments without molecular-targeting agents, PFS was ~2.5–4 months with response rates <5%. Compared with second-line trials without bevacizumab, our marked prolongation of PFS could be related to the addition of bevacizumab beyond progression [14–16]. The potential effect of racial differences on tolerability for capecitabine in the east Asian population should be also considered [17]. These advantages would be vital for beyond-progression strategies.

The XELIRI regimen requires only 1 visit per 3-week cycle for a 2- or 3-hour infusion, which may provide a marked advantage over the FOLFIRI regimen in terms of convenience for both patients and clinical staff. XELIRI plus bevacizumab should be considered as a possible standard second-line treatment for Japanese patients with metastatic colorectal cancer. A phase III trial randomizing XELIRI plus bevacizumab versus FOLFIRI plus bevacizumab began in October 2013.

## References

1. Cassidy J, Clarke S, Díaz-Rubio E et al. Randomized phase III study of capecitabine plus oxaliplatin compared with fluorouracil/folinic acid plus oxaliplatin as first-line therapy for metastatic colorectal cancer. *J Clin Oncol* 2008;26:2006–2012.
2. Rothenberg ML, Cox JV, Butts C et al. Capecitabine plus oxaliplatin (XELOX) versus 5-fluorouracil/folinic acid plus oxaliplatin (FOLFOX-4) as second-line therapy in metastatic colorectal cancer: A randomized phase III noninferiority study. *Ann Oncol* 2008;19:1720–1726.
3. Patt YZ, Lee FC, Liebmman JE et al. Capecitabine plus 3-weekly irinotecan (XELIRI regimen) as first-line chemotherapy for metastatic colorectal cancer: Phase II trial results. *Am J Clin Oncol* 2007;30:350–357.
4. Park SH, Bang SM, Cho EK et al. First-line chemotherapy with irinotecan plus capecitabine for advanced colorectal cancer. *Oncology* 2004;66:353–357.
5. Rea DW, Nortier JW, Ten Bokkel Huinink WW et al. A phase I/II and pharmacokinetic study of irinotecan in combination with capecitabine as first-line therapy for advanced colorectal cancer. *Ann Oncol* 2005;16:1123–1132.
6. Borner MM, Bernhard J, Dietrich D et al. A randomized phase II trial of capecitabine and two different schedules of irinotecan in first-line treatment of metastatic colorectal cancer: Efficacy, quality-of-life and toxicity. *Ann Oncol* 2005;16:282–288.
7. Bajetta E, Di Bartolomeo M, Mariani L et al. Randomized multicenter phase II trial of two different schedules of irinotecan combined with capecitabine as first-line treatment in metastatic colorectal carcinoma. *Cancer* 2004;100:279–287.
8. Fuchs CS, Marshall J, Mitchell E et al. Randomized, controlled trial of irinotecan plus infusional, bolus, or oral fluoropyrimidines in first-line treatment of metastatic colorectal cancer: Results from the BICC-C study. *J Clin Oncol* 2007;25:4779–4786.
9. Schmiegel W, Reinacher-Schick A, Arnold D et al. Capecitabine/irinotecan or capecitabine/oxaliplatin in combination with bevacizumab is effective and safe as first-line therapy for metastatic colorectal cancer: A randomized phase II study of the AIO colorectal study group. *Ann Oncol* 2013;24:1580–1587.
10. Ducreux M, Adenis A, Pignon JP et al. Efficacy and safety of bevacizumab-based combination regimens in patients with previously untreated metastatic colorectal cancer: Final results from a randomised phase II study of bevacizumab plus 5-fluorouracil, leucovorin plus irinotecan versus bevacizumab plus capecitabine plus irinotecan (FNCLCC ACCORD 13/0503 study). *Eur J Cancer* 2013;49:1236–1245.
11. Sobrero AF, Maurel J, Fehrenbacher L et al. EPIC: Phase III trial of cetuximab plus irinotecan after fluoropyrimidine and oxaliplatin failure in patients with metastatic colorectal cancer. *J Clin Oncol* 2008;26:2311–2319.
12. Muro K, Boku N, Shimada Y et al. Irinotecan plus S-1 (IRIS) versus fluorouracil and folinic acid plus irinotecan (FOLFIRI) as second-line chemotherapy for metastatic colorectal cancer: A randomised phase 2/3 non-inferiority study (FIRIS study). *Lancet Oncol* 2010;11:853–860.
13. Van Cutsem E, Tabernero J, Lakomy R et al. Addition of aflibercept to fluorouracil, leucovorin, and irinotecan improves survival in a phase III randomized trial in patients with metastatic colorectal cancer previously treated with an oxaliplatin-based regimen. *J Clin Oncol* 2012;30:3499–3506.
14. Giantonio BJ, Catalano PJ, Meropol NJ et al. Bevacizumab in combination with oxaliplatin, fluorouracil, and leucovorin (FOLFOX4) for previously treated metastatic colorectal cancer: Results from the Eastern Cooperative Oncology Group Study E3200. *J Clin Oncol* 2007;25:1539–1544.
15. Grothey A, Sugrue MM, Purdie DM et al. Bevacizumab beyond first progression is associated with prolonged overall survival in metastatic colorectal cancer: Results from a large observational cohort study (BRiTE). *J Clin Oncol* 2008;26:5326–5334.
16. Bennouna J, Sastre J, Arnold D et al. Continuation of bevacizumab after first progression in metastatic colorectal cancer (ML18147): A randomised phase 3 trial. *Lancet Oncol* 2013;14:29–37.
17. Haller DG, Cassidy J, Clarke SJ et al. Potential regional differences for the tolerability profiles of fluoropyrimidines. *J Clin Oncol* 2008;26:2118–2123.

## Figures and Tables

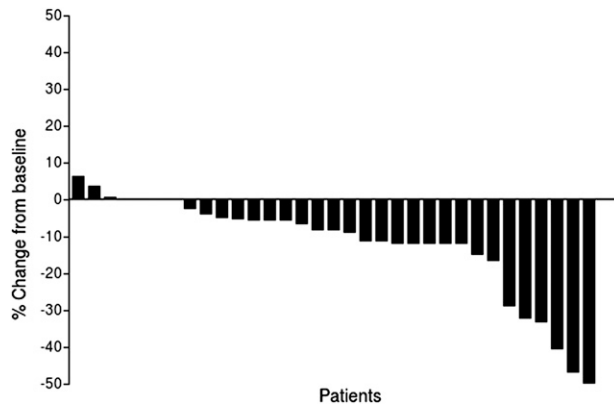

Figure 1. Waterfall plot.

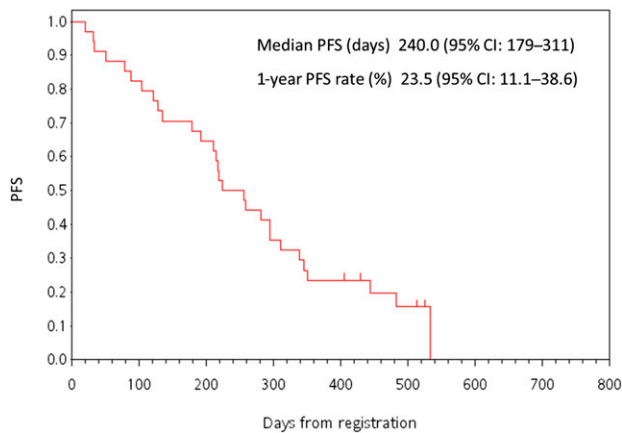

Figure 2. Progression-free survival.  
Abbreviations: CI, confidence interval; PFS, progression-free survival.

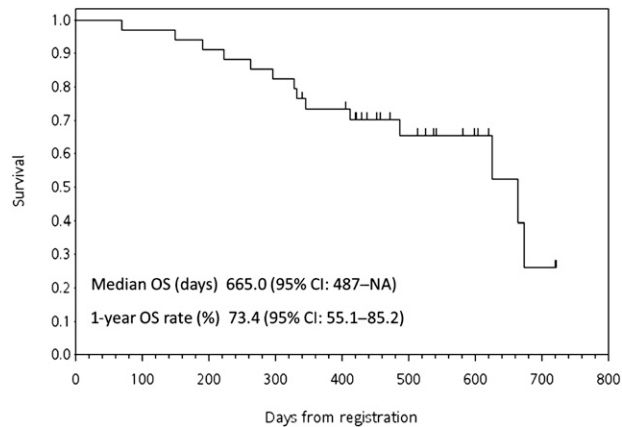

Figure 3. Survival.  
Abbreviations: CI, confidence interval; NA, not available; OS, overall survival.

**Table 1.** Adverse events

| Name                                  | *NC/NA | 1   | 2   | 3   | 4  | 5  | All grades |
|---------------------------------------|--------|-----|-----|-----|----|----|------------|
| Leukocytes (total WBC)                | 41%    | 23% | 35% | 0%  | 0% | 0% | 58%        |
| Neutrophils/granulocytes (ANC/AGC)    | 44%    | 8%  | 35% | 11% | 0% | 0% | 55%        |
| Hemoglobin                            | 29%    | 50% | 17% | 2%  | 0% | 0% | 70%        |
| Platelets                             | 52%    | 41% | 5%  | 0%  | 0% | 0% | 47%        |
| Diarrhea                              | 50%    | 14% | 29% | 5%  | 0% | 0% | 50%        |
| Anorexia                              | 47%    | 32% | 14% | 5%  | 0% | 0% | 52%        |
| Nausea                                | 47%    | 32% | 11% | 8%  | 0% | 0% | 52%        |
| Vomiting                              | 70%    | 20% | 5%  | 2%  | 0% | 0% | 29%        |
| Fatigue (asthenia, lethargy, malaise) | 61%    | 11% | 23% | 2%  | 0% | 0% | 38%        |
| Mucositis/stomatitis (clinical exam)  | 82%    | 11% | 5%  | 0%  | 0% | 0% | 17%        |
| Dizziness                             | 94%    | 0%  | 0%  | 5%  | 0% | 0% | 5%         |
| Neuropathy: sensory                   | 70%    | 17% | 8%  | 2%  | 0% | 0% | 29%        |
| Hair loss/alopecia (scalp or body)    | 67%    | 17% | 14% | 0%  | 0% | 0% | 32%        |
| Rash: hand-foot skin reaction         | 38%    | 44% | 11% | 5%  | 0% | 0% | 61%        |
| Renal/genitourinary, other            | 52%    | 20% | 23% | 2%  | 0% | 0% | 47%        |
| Hypertension                          | 67%    | 5%  | 17% | 8%  | 0% | 0% | 32%        |

\*No Change From Baseline/No Adverse Event

Adverse events during phase I/II treatment; no serious adverse events were reported.

Abbreviations: AGC, absolute granulocyte count; ANC, absolute neutrophil count; WBC, white blood cells.

**Table 2.** Baseline patient characteristics

| Characteristics                 | Phase I (n = 6) | Phase I/II (n = 34) |
|---------------------------------|-----------------|---------------------|
| Age, years, median (range)      | 64 (57–72)      | 60 (22–74)          |
| Sex                             |                 |                     |
| Male                            | 4               | 24                  |
| Female                          | 2               | 10                  |
| Primary tumor site              |                 |                     |
| Colon                           | 4               | 21                  |
| Rectum                          | 2               | 13                  |
| ECOG PS                         |                 |                     |
| 0                               | 4               | 22                  |
| 1                               | 2               | 12                  |
| UGT1A1                          |                 |                     |
| Wild type                       | 3               | 21                  |
| *6 Heterozygous                 | 3               | 7                   |
| *28 Heterozygous                | 0               | 6                   |
| Resection of primary tumor, yes | 5               | 32                  |
| Metastatic site                 |                 |                     |
| Liver                           | 3               | 20                  |
| Lung                            | 4               | 22                  |
| Lymph nodes                     | 2               | 7                   |
| Peritoneum                      | 0               | 4                   |
| Other                           | 2               | 5                   |
| Initial treatments              |                 |                     |
| Regimen                         |                 |                     |
| FOLFOX4 plus bevacizumab        | 0               | 1                   |
| mFOLFOX6 plus bevacizumab       | 2               | 15                  |
| XELOX plus bevacizumab          | 2               | 10                  |
| Other <sup>a</sup>              | 2               | 8                   |

|                                          |               |               |
|------------------------------------------|---------------|---------------|
| Treatment duration, days, median (range) | 183 (118–360) | 238 (69–1621) |
| Best overall response                    |               |               |
| Complete response                        | 0             | 1             |
| Partial response                         | 1             | 17            |
| Stable disease                           | 4             | 12            |
| Progressive disease                      | 0             | 2             |
| Not evaluable                            | 1             | 2             |
| Reasons for termination                  |               |               |
| Progression                              | 6             | 33            |
| Surgery                                  | 0             | 1             |

<sup>a</sup>Six patients received S-1 plus oxaliplatin plus bevacizumab; 2 patients received S-1/LV plus oxaliplatin plus bevacizumab. Abbreviations: ECOG PS, Eastern Cooperative Oncology Group performance status; mFOLFOX6, modified FOLFOX6 regimen.

**Table 3.** Dose intensity of chemotherapy with capecitabine and irinotecan plus bevacizumab

| Relative dose intensity        | Irinotecan         | Capecitabine       | Bevacizumab <sup>a</sup> |
|--------------------------------|--------------------|--------------------|--------------------------|
| Mean (95% confidence interval) | 91.30 (66.1–116.6) | 89.40 (58.5–120.4) | 96.30 (77.3–115.3)       |
| Median (range)                 | 100 (47.9–100)     | 100 (30.0–100)     | 100 (50.0–100)           |
| Full dose, <i>n/n</i>          | 20/34              | 20/34              | 33/34                    |

<sup>a</sup>Bevacizumab: fixed dose (7.5 mg/kg). Data shown are percentages unless otherwise specified.

**Table 4.** Adverse events during phase I/II treatment

| Adverse event      | Grade, CTCAE version 3.0 ( <i>n</i> = 34), <i>n</i> |    |   |   | All (%) | Grade ≥3 (%) |
|--------------------|-----------------------------------------------------|----|---|---|---------|--------------|
|                    | 1                                                   | 2  | 3 | 4 |         |              |
| Leucopenia         | 8                                                   | 12 | 0 | 0 | 58.8    | 0            |
| Neutropenia        | 3                                                   | 12 | 4 | 0 | 55.9    | 11.8         |
| Anemia             | 17                                                  | 6  | 1 | 0 | 70.6    | 2.9          |
| Thrombocytopenia   | 14                                                  | 2  | 0 | 0 | 47.1    | 0            |
| Diarrhea           | 5                                                   | 10 | 2 | 0 | 50      | 5.9          |
| Anorexia           | 11                                                  | 5  | 2 | 0 | 52.9    | 5.9          |
| Nausea             | 11                                                  | 4  | 3 | 0 | 52.9    | 8.8          |
| Vomiting           | 7                                                   | 2  | 1 | 0 | 29.4    | 2.9          |
| Fatigue            | 4                                                   | 8  | 1 | 0 | 38.2    | 2.9          |
| Stomatitis         | 4                                                   | 2  | 0 | 0 | 17.6    | 0            |
| Dizziness          | 0                                                   | 0  | 2 | 0 | 5.9     | 5.9          |
| Neuropathy         | 6                                                   | 3  | 1 | 0 | 29.4    | 2.9          |
| Alopecia           | 6                                                   | 5  | 0 | 0 | 32.4    | 0            |
| Hand-foot syndrome | 15                                                  | 4  | 2 | — | 61.8    | 5.9          |
| Proteinuria        | 7                                                   | 8  | 1 | 0 | 47.1    | 2.9          |
| Hypertension       | 2                                                   | 6  | 3 | 0 | 32.4    | 8.8          |
| Bleeding           | 2                                                   | 1  | 0 | 0 | 8.8     | 0            |

Median number of cycles: 9 (range: 1–21). No serious adverse events were observed. Abbreviations: —, no data; CTCAE, Common Terminology Criteria for Adverse Events.

[Click here](#) to access other published clinical trials.
